# Supplementary material
Source: Springer Nature journal article supplement (https://www.springermedizin.de/resource/supplementary/12245_2010_68_MOESM3_ESM.pdf/9672706)

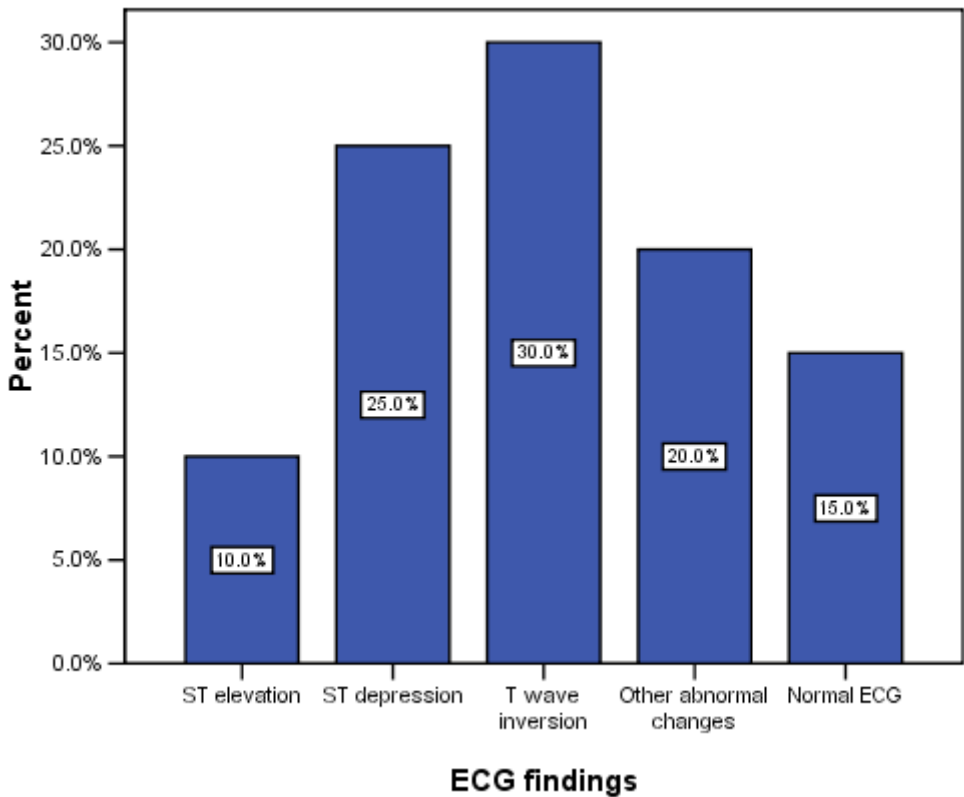

Supplement: MOESM3 [file 9672706]
